1 **Title:** Pooling of samples to optimize SARS-CoV-2 diagnosis by RT-qPCR: comparative  
2 analysis of two protocols.

3

4 **Running Title: Pooling samples to detect SARS-CoV-2 by RT-qPCR**

5

6 VOLPATO, Fabiana<sup>a, b, c</sup>; LIMA-MORALES, Daiana<sup>a, c</sup>; WINK, Priscila Lamb<sup>a, c, d</sup>, WILLIG,  
7 Julia <sup>c, e</sup>; PARIS, Fernanda<sup>c</sup>; ASHTON-PROLLA, Patricia<sup>f, e</sup>; BARTH, Afonso Luís<sup>a, b, c, d\*</sup>

8

9 <sup>a</sup> LABRESIS- Laboratório de Pesquisa em Resistência Bacteriana, Centro de Pesquisa  
10 Experimental, Hospital de Clínicas de Porto Alegre (HCPA), Porto Alegre, RS, Brazil

11 <sup>b</sup> Programa de Pós-Graduação em Ciências Médicas (PPGCM), Faculdade de Medicina,  
12 Universidade Federal do Rio Grande do Sul (UFRGS), Porto Alegre, RS, Brazil

13 <sup>c</sup> Laboratório de Diagnóstico de SARS-CoV-2 (Lab Covid) Hospital de Clínicas de Porto  
14 Alegre (HCPA), Porto Alegre, RS, Brazil

15 <sup>d</sup> Programa de Pós-Graduação em Ciências Farmacêuticas (PPGCF), Faculdade de  
16 Farmácia, UFRGS, Porto Alegre, RS, Brazil

17 <sup>e</sup> Programa de Residência Multiprofissional do Hospital de Clínicas de Porto Alegre  
18 (HCPA), Porto Alegre, RS, Brazil

19 <sup>f</sup> Departamento de Genética, UFRGS, Porto Alegre, RS, Brazil

20 <sup>e</sup> Grupo de Pesquisa e Pós-Graduação e Pós Graduação, HCPA, Porto Alegre, RS, Brazil

21

22 \*Corresponding author: Afonso Luís Barth, LABRESIS- Laboratório de Pesquisa em  
23 Resistência Bacteriana, Hospital de Clínicas de Porto Alegre, Rua Ramiro Barcelos 2350,  
24 Porto Alegre, RS, Brazil, 90.035-903. E-mail: [albarth@hcpa.edu.br](mailto:albarth@hcpa.edu.br); Phone:  
25 +555133598607.

26 **NOTE:** This preprint reports new research that has not been certified by peer review and should not be used to guide clinical practice.

27 **Abstract**

28 RT-qPCR for SARS-CoV-2 is the main diagnostic test used to identify the novel  
29 coronavirus. Several countries have used large scale SARS-CoV-2 RT-qPCR testing as  
30 one of the important strategies for combating the pandemic. In order to process the  
31 massive needs for coronavirus testing, the usual throughput of routine clinical laboratories  
32 has reached and often surpassed its limits and new approaches to cope with this  
33 challenge must be developed. This study has aimed to evaluate the use pool of samples  
34 as a strategy to optimize the diagnostic of SARS-CoV-2 by RT-qPCR in a general  
35 population. A total of 220 naso/orofaryngeal swab samples were collected and tested  
36 using two different protocols of sample pooling. In the first protocol (Protocol A); 10 clinical  
37 samples were pooled before RNA extraction. The second protocol (Protocol B) consisted  
38 of pooling the already extracted RNAs from 10 individual samples. Results from Protocol A  
39 were identical (100% agreement) with the individual results. However, for results from  
40 Protocol B, reduced agreement (91%) was observed in relation to results obtained by  
41 individual testing. Inconsistencies observed were related to RT-qPCR results with higher  
42 Cycle Thresholds ( $Ct > 32.73$ ). Furthermore, in pools containing more than one positive  
43 individual, the Ct of the pool was equivalent to the lowest Ct among the individual results.  
44 These results provide additional evidence in favor of the clinical use of pooled samples for  
45 SARS-CoV-2 diagnosis by RT-qPCR and suggest that pooling of samples before RNA  
46 extraction is preferable in terms of diagnostic yield.

47

48 **Key-words:** Molecular Diagnostic, Pooling Sample, SARS-CoV-2, RT-qPCR, Massive  
49 Testing.

## 50 **Introduction**

51           Due to the exponential increase of respiratory syndromes by SARS-CoV-2, the  
52 World Health Organization (WHO) declared COVID-19 a pandemic of worldwide  
53 importance (1). The rapid propagation of the virus significantly increases the demand on  
54 the health care system. In response to the challenge of identifying and isolating infected  
55 patients, in an attempt to minimize spread of the disease, two different types of tests have  
56 been used: real time Reverse Transcriptase Polymerase Chain Reaction (RT-qPCR) for  
57 SARS-CoV-2 diagnosis mainly in upper respiratory tract samples and serum IgM and/or  
58 IgG antibody detection assays to detect past infection and possibly immunity to the  
59 disease.

60           In order to avoid diagnostic cross-reactivity with other endemic coronaviruses, most  
61 RT-qPCR assays include primers for at least two different molecular targets, such as  
62 nucleocapsid proteins 1 (N1) and 2 (N2) (2). A major advantage of real time assays is that  
63 amplification and analysis of the final product are performed simultaneously in a closed  
64 system. This procedure minimizes false-positive results associated with amplification of  
65 unspecific products (2).

66           Several countries have used RT-qPCR in large scale efforts as a mainstream  
67 initiative for combating the SARS-CoV-2 pandemic. To enable massive coronavirus testing  
68 thousands of laboratories worldwide have expanded their routine and in several countries  
69 high-throughput automated testing was implemented mainly in reference centers. However,  
70 many laboratories, especially in underserved areas became overloaded and new  
71 approaches to cope with this ever increasing and long lasting challenge are needed,  
72 especially in developing countries and if a strategy of massive testing, including  
73 asymptomatic individuals is adopted. A few studies have provided encouraging results  
74 that support the use of sample pooling as a robust and cost/time-saving approach in this

75 extreme scenario. In this brief report, we provide additional evidence in favor of SARS-  
76 CoV-2 RT-qPCR analysis with pooled samples using two different methodologies.

77

## 78 **Materials and Methods**

79 **Sample Pooling.** A total of 220 samples from different patients were obtained by  
80 oro/nasopharyngeal swabbing performed by trained personnel in a single institution.  
81 Individual swabs were mixed with 3mL of NaCl 0.9% solution. Two strategies of pooling  
82 samples were evaluated: 1) Protocol A: consisted of 10 samples grouped (100 $\mu$ L from  
83 each sample) before RNA extraction; 2) Protocol B: consisted of 10 samples group (4 $\mu$ L of  
84 each) after the individual RNA extraction. Results from both protocols were compared to  
85 individual analyses of the same samples, performed in parallel to the analysis of the pools.  
86 RNA was extracted from all samples using the Abbott m2000sp automated system (Abbott  
87 Laboratories, Chicago, USA) and the Abbott Sample Preparation System - 4x24 Preps  
88 (Promega Corporation, Wisconsin, USA).

89 **RT-qPCR Reaction.** A previously validated SARS-CoV-2 RT-qPCR protocol following the  
90 CDC guidelines and primers was used. In brief, Superscript III (SSIII) one step RT-qPCR  
91 system (Thermo Fisher Scientific Inc, California, USA) was used for RT-qPCR reactions.  
92 The master mix was composed of 5 $\mu$ L of 2X reaction buffer (0.4 mM of each dNTP and 6  
93 mM MgSO<sub>4</sub>); 0.2 $\mu$ L of SuperScript™ III RT/Platinum™ Taq Mix; 0.2 $\mu$ L of ROX (dilution  
94 1:10); 0.75 $\mu$ L of combined primers/probes mix of nCOV1 (N1 primer) or nCOV2 (N2  
95 primer) or RP (2019-nCoV RUO Kit, IDT, Integrated DNA Technologies Inc, Iowa, USA)  
96 and 4 $\mu$ L of extracted RNA. The human ribonuclease P gene (RNase P) was used as  
97 internal control to monitor nucleic acid extraction, specimen quality and presence of  
98 reaction inhibitors. Thermal cycling was performed at 50°C for 30 min for reverse  
99 transcription, followed by 95 °C for 2 min and then 45 cycles of 95°C for 15s, 55 °C for 35s  
100 in QuantStudio® 3 Applied Biosystems™ (Applied Biosystems, Massachusetts, USA). The

101 result was considered “negative” when neither N1 nor N2 targets amplified and “positive”  
102 when both N1 and N2 targets amplified. RT-qPCR was considered “inconclusive” when  
103 only one target (N1 or N2) amplified. Individual samples and pools with positive results had  
104 the values of the Cycle Threshold (Ct) recorded. In order to analyze performance of the  
105 assays with pooled samples, Ct values of individual and pooled sample runs were  
106 compared.

107 To minimize inter-experiment variability (“batch effects”) simultaneous analysis of  
108 the individual samples and their corresponding pools was undertaken in the same RT-  
109 qPCR reaction. The 220 samples included in this study were sorted in 22 pools with 10  
110 clinical samples each, for each protocol. The individual composition of the 22 pools for  
111 each protocol (A and B) was as follows: all negative samples (1/22), one inconclusive  
112 sample (1/22), only one positive sample (8/22), two positive samples (7/22), three positive  
113 samples (3/22), four positive samples (1/22), and five positive samples (1/22) (Table 1)

## 115 **Results**

116 There was 100% and 91% of agreement when the results from individual and  
117 pooled samples with Protocol A (22 of 22) and Protocol B (20 of 22), respectively, were  
118 compared. The Cts of the individual samples with positive results ranged from 13.22 to  
119 37.14, for both N1 and N2 targets. The Cts of the two individual samples with divergent  
120 results in Protocol B were >32.73 – Table 1. RNase P used as a quality control presented  
121 very satisfactory results (Cts between 26 to 32).

122 It was possible to observe that Cts (both targets) of pooled samples in Protocol A  
123 with positive results in the RT-qPCR tended to be 3 units higher in average when  
124 compared to Cts of the individual tested positive samples (Table 1). This increase was  
125 also observed in pools of the Protocol B for the N1 target but the Ct of N2 target presented  
126 a difference of 4 units in average compared to the individually tested samples. Noteworthy,

127 in pools with more than one positive sample, Ct of the pool was similar to the lowest Ct  
128 obtained in the individual analyses of the samples included in the pool (Table 1).

129

## 130 **Discussion**

131 A rapid and reliable laboratory diagnosis of SARS-CoV-2 infection plays a crucial  
132 role for public health interventions related to the new coronavirus pandemic (3). RT-qPCR  
133 detection of the virus by oro/nasopharyngeal swabbing is characterized by good sensitivity  
134 and high specificity and has been regarded as the "gold standard" for the virus genome  
135 detection (4). However, it is still a semi-automated strategy which includes several  
136 sequential analytical steps and is associated with significant costs. Sample pooling is a  
137 well known approach to optimize time and costs of massive screening strategies for  
138 infectious diseases and has been reported as a reliable technique for Hepatitis B, Hepatitis  
139 C and Human Immunodeficiency Virus in blood banks (5).

140 In this study, we demonstrate that RT-qPCR with primers for the nucleocapsid of  
141 SARS-CoV-2 using pooled samples (10/pool) is able to provide a correct diagnosis even  
142 when only one individual sample is positive in the pool. In fact, the pool RT-qPCR analysis  
143 identified a positive sample (Protocol A) even when the single sample analysis had a later  
144 Ct ( $Ct > 32.73$ ). As previously described, pools with a high number of samples (30  
145 samples) may present false-negative results in the RT-qPCR for SARS-CoV-2 especially  
146 when a positive sample has a later Ct (6). Therefore, according to our experience, we  
147 suggest to make pools with a maximum of 10 samples/pool as this approach increases  
148 significantly the diagnostic capacity of the labs without losing quality.

149 However, the size of the pool can accommodate different infection scenarios and it  
150 can be adequate if necessary, according to the institution necessity as suggested by  
151 Lohse et al (6). It has to be considered that the use of pools would present best

152 performance whether the population in analysis is expected to present low incidence of the  
153 COVID-19 such as people without symptoms, for example.

154         The best performance of Protocol A in relation to Protocol B in our study is probably  
155 related to a larger volume of each individual clinical sample added to the pool (100µL of  
156 clinical sample). Furthermore, Protocol A is operationally straightforward and less time  
157 consuming as it requires only one RNA extraction. Moreover, the only pool which  
158 contained an individual sample with inconclusive result presented inconclusive result only  
159 using the Protocol A.

160         According to Buckingham et al (7), the absolute Ct comparison is only meaningful  
161 when comparing experiments using the same reaction conditions. In this study, the  
162 individual and pooled samples were tested together in the same experimental run, and  
163 using the same reagents. Considering the Ct differences between a positive individual  
164 sample and the same sample tested in a pool, we observed an average variation of 3 units  
165 of Ct (Protocol A). According to the literature, using the same sample in a 10-fold dilution  
166 series, the Ct values differ by ~3.3 units (7). These data corroborate with the Ct variation  
167 found in this study between the result of the RT-qPCR for SARS-CoV-2 of the individual  
168 sample and of this sample in a pool with nine others. We also found that pools with more  
169 than one positive sample present Cts more related to the lower Ct of the sample tested  
170 individually.

171         Finally, the results of this study indicate that it is possible to obtain positive results  
172 of RT-qPCR for SARS-CoV2 when combining 10 clinical samples in one pool (Protocol A).  
173 The pooling of clinical samples would increase significantly test capacity of the  
174 laboratories. The use of pools would be much more effective to test clinical samples in  
175 scenarios of low prevalence of SARS-CoV-2 as a positive result of the pool will require that  
176 all samples be tested individually. In conclusion, to test populations in a large scale, the  
177 use of pools is a very useful strategy as an epidemiological screening method.

178 **Acknowledgments**

179           This study received a grant of “Fundação de Apoio a Pesquisa e Ensino do rio  
180 Grande do Sul (FAPERGS)” (#20-2551-0000265-9) as well as of “Fundo de Incentivo a  
181 Pesquisa e Eventos do Hospital de Clínicas de Porto Alegre (FIPE/HCPA) – (#2020-  
182 0163).

183



## 184 **References**

- 185 1. Sun J, He WT, Wang L, Lai A, Ji X, Zhai X, Li G, Suchard MA, Tian J, Zhou J, Veit  
186 M, Su S. 2020. COVID-19: Epidemiology, Evolution, and Cross-Disciplinary  
187 Perspectives. *Trends Mol Med* 26:483-495.  
188 <https://doi.org/10.1016/j.molmed.2020.02.008>
- 189 2. Tang YW, Schmitz JE, Persing DH, Stratton CW. 2020. Laboratory Diagnosis of  
190 COVID-19: Current Issues and Challenges. *J Clin Microbiol* 58:e00512-20.  
191 <https://doi.org/10.1128/JCM.00512-20>
- 192 3. Lu X, Whitaker B, Sakthivel SKK, Kamili S, Rose LE, Lowe L, Mohareb E, Ellassal  
193 EM, Al-sanouri T, Haddadin A, Erdman DD. 2014. Real-Time Reverse  
194 Transcription-PCR assay panel for Middle East Respiratory Syndrome Coronavirus.  
195 *J Clin Microbiol* 52(1):67-75. <https://doi.org/10.1128/JCM.02533-13>
- 196 4. Shen M, Zhou Y, Ye J, Al-maskri AAA, Kang Y, Zeng S, Cai S. 2020. Recent  
197 advances and perspectives of nucleic acid detection for coronavirus. *J Pharm Anal*  
198 10:97-101. <https://doi.org/10.1016/j.jpha.2020.02.010>
- 199 5. Nguyen T, Bang D D, Wolff A. 2020. 2019 Novel Coronavirus Disease (COVID-19):  
200 Paving the road for rapid detection and Point-of-Care diagnostics. *Micromachines*  
201 11. <https://doi.org/10.3390/mi11030306>
- 202 6. Lohse S, Pfuhl T, Berkó-Göttel B, Rissland J, Geißler T, Gärtner B. 2020. Pooling of  
203 samples for testing for SARS-CoV-2 in asymptomatic people. *Lancet Infect Dis*.  
204 [https://doi.org/10.1016/S1473-3099\(20\)30362-5](https://doi.org/10.1016/S1473-3099(20)30362-5)
- 205 7. Buckingham L. 2019. Chapter 6: Nucleic Acid Amplification, p 142-178. *In*  
206 Buckingham L. *Molecular Diagnostics: Fundamentals, Methods, and Clinical*  
207 *Applications*, 3th ed, F.A. Davis Company.

208 **Table 1:** Cycle Threshold results of pooling samples for detection of SARS-CoV-2 by RT-qPCR.

| Pool Identification | Protocol A* Ct N1 | Protocol A Ct N2 | Protocol B** Ct N1 | Protocol B Ct N2 | Number of positive samples in the pool | Value of lower Ct positive in the pool N1 | Value of lower Ct positive in the pool N2 |
|---------------------|-------------------|------------------|--------------------|------------------|----------------------------------------|-------------------------------------------|-------------------------------------------|
| POOL 1              | Negative          | Negative         | Negative           | Negative         | 0                                      | -                                         | -                                         |
| POOL 2              | 35.44             | 38.46            | Negative           | Negative         | 1                                      | 32.73                                     | 35.05                                     |
| POOL 3              | 22.02             | 22.64            | 22.26              | 22.99            | 2                                      | 19.02                                     | 19.96                                     |
| POOL 4              | 16.66             | 16.82            | 16.84              | 16.78            | 1                                      | 13.54                                     | 13.22                                     |
| POOL 5              | 20.57             | 20.98            | 20.96              | 21.25            | 1                                      | 17.39                                     | 17.85                                     |
| POOL 6              | Negative          | 27.72            | Negative           | Negative         | Inconclusive                           | Negative                                  | 37.14                                     |
| POOL 7              | 24.13             | 25.31            | 27.36              | 29.06            | 1                                      | 20.37                                     | 20.23                                     |
| POOL 8              | 35.41             | 38.97            | Negative           | 38.42            | 1                                      | 33,79                                     | 36.28                                     |
| POOL 9              | 19.35             | 21.18            | 19.81              | 21.53            | 2                                      | 16.06                                     | 17.39                                     |
| POOL 10             | 21.04             | 21.94            | 20.69              | 20.59            | 2                                      | 18.17                                     | 18.82                                     |
| POOL 11             | 21.61             | 23.29            | 21.48              | 23.42            | 5                                      | 19.12                                     | 18.91                                     |
| POOL 12             | 31.21             | 33.27            | 30.41              | 33.23            | 2                                      | 27.07                                     | 29.23                                     |
| POOL 13             | 20.54             | 20.32            | 24.48              | 25.12            | 4                                      | 20.89                                     | 20.55                                     |
| POOL 14             | 24.08             | 27.24            | 20.79              | 22.36            | 3                                      | 18.23                                     | 19.39                                     |
| POOL 15             | 17.00             | 18.21            | 16.97              | 18.18            | 3                                      | 13.55                                     | 15.01                                     |
| POOL 16             | 28.89             | 31.42            | 28.81              | 31.23            | 2                                      | 25.47                                     | 27.17                                     |
| POOL 17             | 20.50             | 21.41            | 20.96              | 21.96            | 3                                      | 17.97                                     | 18.74                                     |
| POOL 18             | 27.57             | 29.11            | 26.54              | 28.7             | 2                                      | 24.05                                     | 25.12                                     |
| POOL 19             | 21.34             | 22.06            | 21.41              | 22.40            | 1                                      | 18.13                                     | 18.59                                     |
| POOL 20             | 32.61             | 34.17            | 32.54              | 39.07            | 1                                      | 29.33                                     | 30.51                                     |
| POOL 21             | 28.02             | 29.26            | 26.99              | 27.26            | 2                                      | 23.68                                     | 24.26                                     |
| POOL 22             | 19.23             | 19.73            | 19.31              | 19.76            | 1                                      | 16.11                                     | 16.74                                     |

209 \*Protocol A: Pooling of clinical samples prior to perform RNA extraction.

210 \*\*Protocol B: Pooling samples after individual RNA extraction.
